# Supplementary material for: The intramolecular aryl embrace: from light emission to light absorption
Source: Royal Society of Chemistry journal article supplement (doi:10.1039/c1dt11052g), 2011-01-01
Supplement: c1dt11052g.pdf [file c1dt11052g.pdf]

## The intramolecular aryl embrace: from light emission to light absorption: ESI

Biljana Bozic-Weber, Edwin C. Constable,\* Catherine E. Housecroft,\* Peter Kopecky,

Markus Neuburger and Jennifer A. Zampese

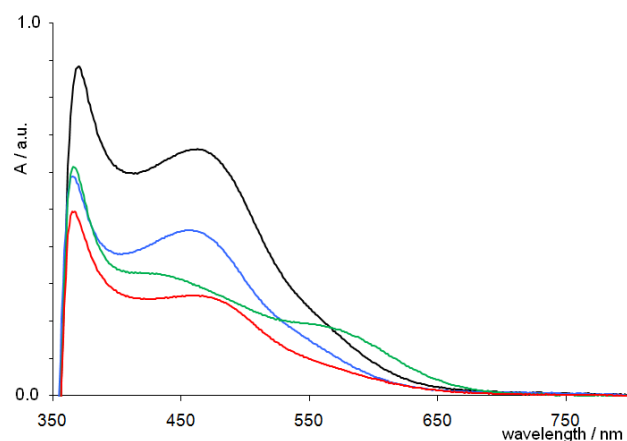

Fig. S1. Solid state diffuse reflectance electronic absorption spectra of TiO<sub>2</sub>-anchored ligands **7** (black), **8** (green), **9** (red) and **10** (blue) after treatment with [Cu(**1**)<sub>2</sub>][PF<sub>6</sub>].

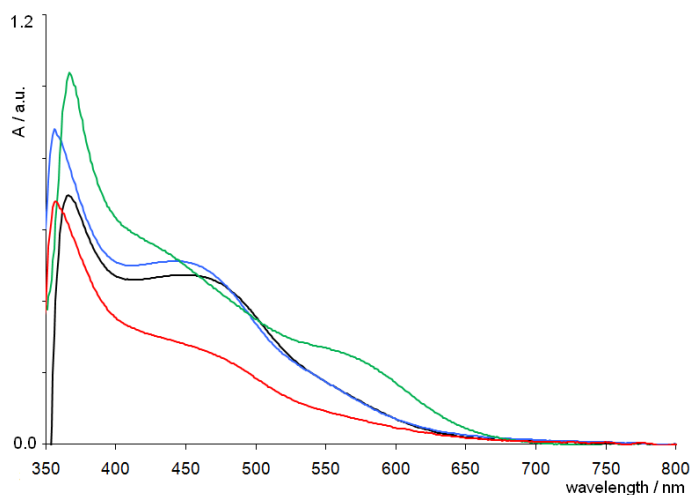

Fig. S2. Solid state diffuse reflectance electronic absorption spectra of TiO<sub>2</sub>-anchored ligands **7** (black), **8** (green), **9** (red) and **10** (blue) after treatment with [Cu(**2**)<sub>2</sub>][PF<sub>6</sub>].

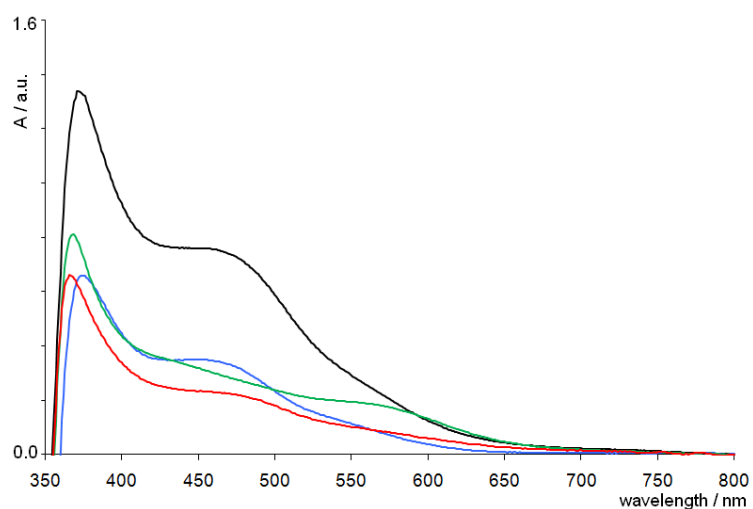

Fig. S3. Solid state diffuse reflectance electronic absorption spectra of TiO<sub>2</sub>-anchored ligands **7** (black), **8** (green), **9** (red) and **10** (blue) after treatment with [Cu(**4**)<sub>2</sub>][PF<sub>6</sub>].

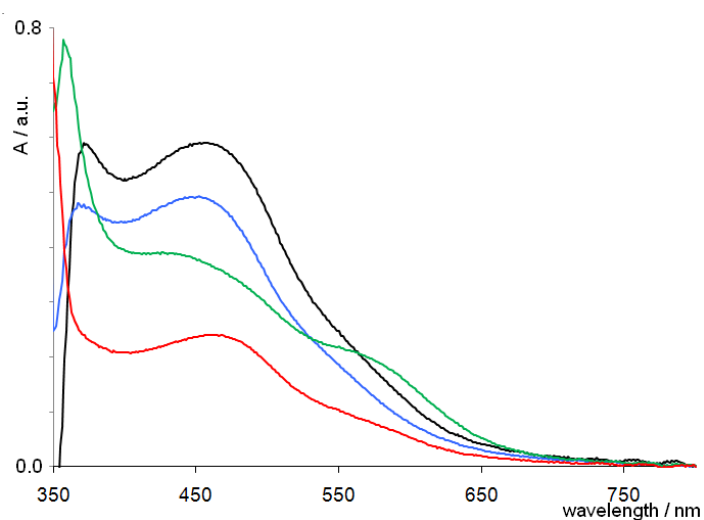

Fig. S4. Solid state diffuse reflectance electronic absorption spectra of TiO<sub>2</sub>-anchored ligands **7** (black), **8** (green), **9** (red) and **10** (blue) after treatment with [Cu(**5**)<sub>2</sub>][PF<sub>6</sub>].

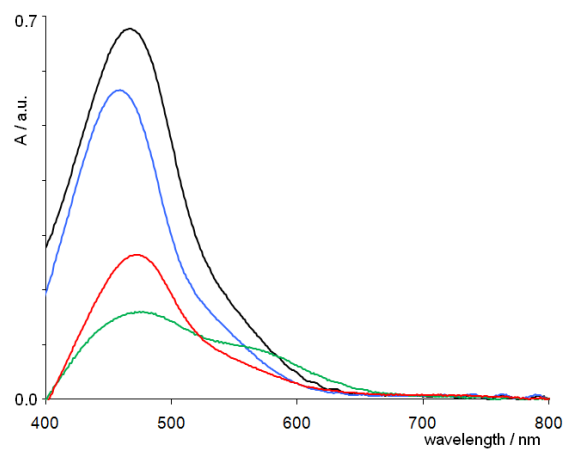

Fig. S5. Solid state diffuse reflectance electronic absorption spectra of TiO<sub>2</sub>-anchored ligands **7** (black), **8** (green), **9** (red) and **10** (blue) after treatment with [Cu(**6**)<sub>2</sub>][PF<sub>6</sub>].
